# Supplementary material
Source: publisher figshare collection journal article supplement (https://gsajournals.figshare.com/ndownloader/files/28169442)
Supplement: Supplementary file 1 [file 28169442]

## Sheet: Table S1
Table S2 The structure and length of the ⍺-factor pheromone as well as the sequence of the mature peptide repeats.
Species	Pheromone Structure	Length of Protein	Repeat Sequence
C. salicis	---■-■-■---	335	■ GWCQAVGQGCW
			■ QWCHIHGQSCW
C. orchidophilum	---□-□-□---	313	□ GWCQNVGQACW
			□ GWCQSVGQSCW
			□ GWCQSVGQSCW
C. tofieldiae	---●---	91	● RWRCTVGQPCW
C. higginsianum	---○-○---	265	○ RWCRSVGQPCW
			○ HWCRTVGQPCW
C. shisoi	---○-○---	266	○ RWCRSVGQPCW
			○ HWCRTVGQPCW
C. tanaceti	---○-○-○---	283	○ RWCRTVGQPCW
C. chlorophyti	---▲-▲-▲-▲---	263	▲ LSCHEPGRPCW
			▲ RWCWKPGQPCW
			▲ PWCREPDQSCW
C. asianum	---△-△-△-△-△-△---	279	△ PWCTQPGQPCW
			△ PWCTEPGQPCW
			△ PWCTKPDQPCW
			△ PWCTKPGQPCW
C. fructicola	---△-△-△-△---	237	△ PWCTKPGQPCW
			△ PWCNKPGQPCW
C. gloeosporioides	---△-△-△-△---	239	△ PWCTKPGQPCW
C. camelliae	---△-△-△-△---	191	△ PWCTKPGQPCW
C. truncatum 1	---◆-◆-◆-◆---	232	◆ ARCHKIGQPCW
			◆ PWCRDPGKSCW
			◆ DWCLRRGQPCW
			◆ PWCRSPDQPCW
C. karstii	---△-△-△-△-△-△-△---	327	△ PWCTKPGQPCW
C. musicola	---⏀-⏀-⏀-⏀---	287	⏀ PWCRQIGQPCW
			⏀ RWCRQIGQPCW
			⏀ PWCRQPGQPCW
C. pluvivorum	---⏀-⏀-⏀-⏀---	247	⏀ PWCRQIGQPCW
			⏀ RWCRQIGQPCW
			⏀ PWCRQPGQPCW
C. sojae	---⏀-⏀-⏀-⏀---	249	⏀ PWCRQPGQPCW
			⏀ RWCRQIGQPCW
			⏀ PWCRKPGQPCW
			⏀ PWCRQIGQPCW
V. dahliae	---◇-◇-◇-◇-◇---	207	◇ KPCPRPGQGCW
V. tricorpus	---◇-◇-◇-◇-◇---	222	◇ PYCPRPGQPCW
			◇ PACPRPGQPCW
			◇ CHDVQPGQPCW
